# Supplementary material for: A new insect trackway from the Upper Jurassic—Lower Cretaceous eolian sandstones of São Paulo State, Brazil: implications for reconstructing desert paleoecology
Source: PeerJ journal article supplement (doi:10.7717/peerj.8880), 2020-05-22
Supplement: Figure_S1.pdf [file Figure_S1.pdf]

Work fronts: 1

2

3

4

South

North

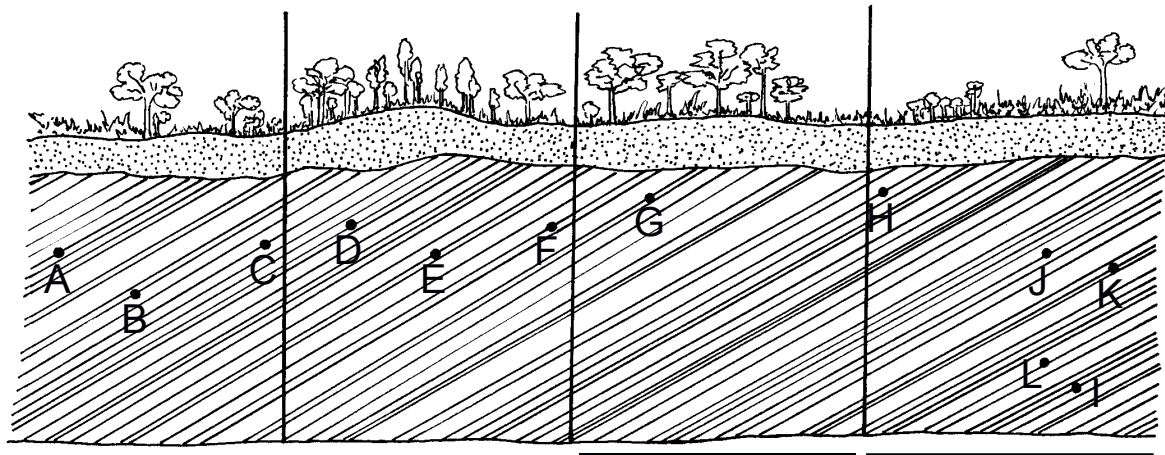

1

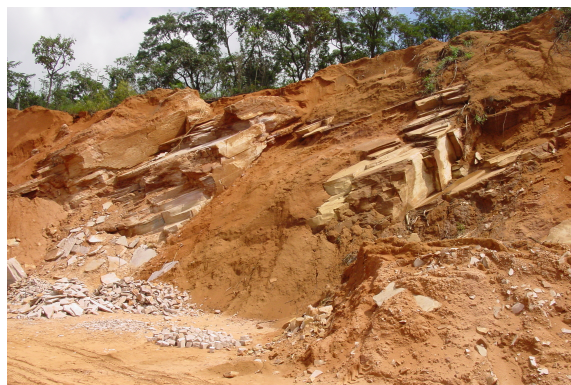

2

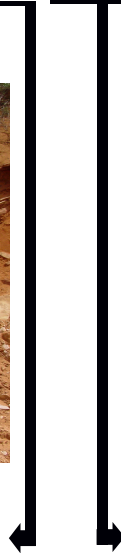

3

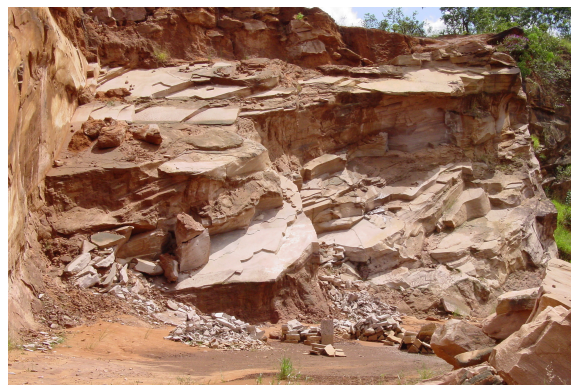

4

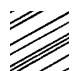

Eolian sandstone

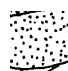

Soil

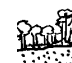

Vegetation
