# Supplementary material for: A new insect trackway from the Upper Jurassic—Lower Cretaceous eolian sandstones of São Paulo State, Brazil: implications for reconstructing desert paleoecology
Source: PeerJ. 2020 May 22;8:e8880. doi: 10.7717/peerj.8880 (PMC7252435; doi:10.7717/peerj.8880)
Supplement: Table S1 [file peerj-08-8880-s005.xls]

## Sheet: Small slabs
Specimen	measure:	External width				Internal width				I/E				Pace				Right row																												Left row
																		Right Stride				Footprint 1 right								Footprint 2 right								Footprint 3 right								Left Stride
	Nº of the series:	1	2	3	4	1	2	3	4	1	2	3	4	1	2	3	4	1	2	3	4	1		2		3		4		1		2		3		4		1		2		3		4		1	2	3	4
																						Lengh	Width	Lengh	Width	Lengh	Width	Lengh	Width	Lengh	Width	Lengh	Width	Lengh	Width	Lengh	Width	Lengh	Width	Lengh	Width	Lengh	Width	Lengh	Width
LPP-IC-0028		23	22.1	22.6	23.5	2.3	1	2.6	3.8	0.1	0.0452489	0.115044	0.161702	5.5	4.8	6.8	6.4		11.9	14.1	12.2	8.1	3.6	4.2	3	5.4	3.1	6	2.6	4.9	2.4	4.2	3.5	4.7	2.8	4.7	2.8	4.8	3.7	5.1	4.1	5.3	3.3	5.6	3.1		12.9	12.6	13.1
LPP-IC-0029		23.9	24.5	22.6	22.7	3.8	2.8	0	4.2	0.158996	0.114286	0	0.185022	4.7	4.5	4.7	3.9	9.9	10.9	12.9	9.4	5	2.1	4.9	2.7	4.7	2.6	3.6	3.2	4.6	2.8	3.9	3.5	5.2	3.4	4.6	3.5	4.3	3.3	4.4	4.4	4.7	3.3	3.4	2.8		11.7	12	12.3
LPP-IC-0032		24.1	19.7	22.5	22.1	1.3	0	3.2	3.3	0.0539419	0	0.142222	0.149321	3.6	1.3	4.2	5.2	10.3	10.4	11.2	11.7	5.5	3.7	6.4	3.5	4.2	2.5	5.1	3.4	4.7	3.4	5	3.1	3.7	2.8	5.4	3	5	3.5	4.5	3.6	4.8	3.5	4.5	3.3			13.4
LPP-IC-0035		27.5	22.4	23.9	20.4	3.6		3.03	2.7	0.130909	0	0.126778	0.132353	4.6		5.2	6.7	11.7	10.4	9.9	12.7			4.4	3.1	4.6	2.7	4.7	2.9	3.8	3.8	4.4	2.7	6.2	3.6	4.9	3.3	5.2	3.4	4.1	2.8	6.1	3.3	5.4	3.7	12.1		10.6	11.5
[truncated: 25 more columns]

## Sheet: LPP-IC-0030
Specimen	Measure:	External width								Internal width								I/E								Pace								Right row
																																		Right stride								Footprint 1 right
	Nº of the series:	1	2	3	4	5	6	7	8	1	2	3	4	5	6	7	8	1	2	3	4	5	6	7	8	1	2	3	4	5	6	7	8	1	2	3	4	5	6	7	8	1		2		3		4
																																										Lengh	Width	Lengh	Width	Lengh	Width	Lengh	Width
LPP-IC-0030		23	23.3	23.2	23.1	23.2	21.6	22.4	22.2	3.3	1.6	0	2.3	1.5	1.5	1.8	1.4	0.143478	0.0686695	0	0.0995671	0.0646552	0.0694444	0.0803571	0.0630631	3.9	4.6	5.6		6	6.6	6.2	5.5	10.7	10.7	11.2	10.8		11	10.9	11.5	3.8	2.3	5	2.6	3.6	2.3	4.4	2.1
[truncated: 89 more columns]

## Sheet: LPP-IC-0031
Specimen	Measure::	External width									Internal width									I/E									Pace									Right row
																																						Right stride									Footprint 1 right
	Nº of the series:	1	2	3	4	5	6	7	8	9	1	2	3	4	5	6	7	8	9	1	2	3	4	5	6	7	8	9	1	2	3	4	5	6	7	8	9	1	2	3	4	5	6	7	8	9	1		2
																																															Lengh	Width	Lengh
LPP-IC-0031		23.22	23.2	23.34	23.4	23.7	22.86	23.64	22.56	23.1	0	0	1	1	2.2	2.84	2.4	0.5	2.74	0	0	0.0428449	0.042735	0.092827	0.124234	0.101523	0.0221631	0.118615	7.22	6.7	7.3	7.3	3.44	6.42	4.8	6.3	5.7	13.2		13.7	10.22	11.5		14.72	7.46	12.08	3.3	2.4	4.78
[truncated: 105 more columns]

## Sheet: Mean
Specimen	External width mean	Internal width mean	Mean I/E	Pace (mean)	Stride (mean)	Specimen	Footprint 1 (mean)			Footprint 2 (Mean)			Footprint 3 (Mean)				Right Stride (Mean)	Footprint 1 right		Footprint 2 right		Footprint 3 right		Left Stride	Footprint 1 left		Footprint 2 left		Footprint 3 left		Comments
							Lenght	Width	L/W	Lenght	Width	L/W	Length	Width	L/W			Mean Length	Mean Width	Mean Length	Mean Width	Mean Length	Mean Width		Mean Length	Mean Width	Mean Length	Mean Width	Mean Length	Mean Width
LPP-IC-0028	22.8	2.425	0.105499	12.7333	12.8	LPP-IC-0028	5.4125	3.1375	1.7251	4.9375	3.025	1.63223	5.11429	3.78571	1.35094		3.525	5.925	3.075	4.625	2.875	5.2	3.55	12.8667	4.9	3.2	5.25	3.175	5	4.1
LPP-IC-0029	23.425	2.7	0.114576	10.775	11.3	LPP-IC-0029	4.975	2.825	1.76106	4.375	3.4125	1.28205	4.275	3.365	1.27043		3.625	4.55	2.65	4.575	3.3	4.2	3.45	12	5.4	3	4.175	3.525	4.35	3.28
LPP-IC-0030	22.75	1.675	0.0736543	5.48571	10.9167	LPP-IC-0030	4.4275	2.725	1.62477	4.13125	2.77125	1.49075	4.21467	3.14667	1.33941		3.5875	4.675	2.625	4.475	2.875	4.24286	3.02857	10.84	4.18	2.825	3.7875	2.6675	4.19	3.25
LPP-IC-0031	23.2244	1.40889	0.0605491	6.13111	11.7487	LPP-IC-0031	4.59625	2.97125	1.54691	4.52667	3.07059	1.4742	4.756	3.81467	1.24677		3.728	4.15429	3.11429	4.27111	3.12	4.40286	3.70571	11.6778	4.94	2.86	4.78222	3.015	5.065	3.91
LPP-IC-0032	22.1	1.95	0.0863713	10.9	11.4	LPP-IC-0032	4.9625	3.1	1.60081	4.4375	3.0125	1.47303	4.77143	3.52857	1.35223		4.125	5.3	3.275	4.7	3.075	4.7	3.475	13.4	4.625	2.925	4.175	2.95	4.86667	3.6
LPP-IC-0035	23.55	3.11	0.0975101	11.175	11.2714	LPP-IC-0035	4.28	2.84	1.50704	4.725	3.275	1.44275	5.4125	3.7375	1.44816		3.725	4.56667	2.9	4.825	3.35	5.2	3.3	11.4	3.85	2.75	4.625	3.2	5.625	4.175
Mean	22.9749	2.21148	0.0896933	9.53336	11.5728	Mean	4.77562	2.93312	1.62761	4.52215	3.09447	1.46584	4.75731	3.56302	1.33466		3.71925	4.86183	2.93988	4.57852	3.09917	4.65762	3.41821	12.0307	4.64917	2.92667	4.46579	3.08875	4.84944	3.71917
Standard deviation/Mean	0.054673	0.572444	0.617717	0.141924	0.110902	Standard deviation/Mean	0.187704	0.172345		0.167826	0.148049		0.163265	0.160465			0.974942	0.983329	0.45188	0.582376	0.387766	0.746278	0.488674	0.951721	0.811222	0.560076	0.9093	0.497701	0.788274	0.624364
LPP-IC-0033	22.1	1.95	0.0863713	10.9		LPP-IC-0033											4.125	5.3	3.275	4.7	3.075	4.7	3.475	13.4	4.625	2.925	4.175	2.95	4.86667	3.6	Not measured because of the poor preservation
LPP-IC-0034	22.1	1.95	0.0863713	10.9		LPP-IC-0034											4.125	5.3	3.275	4.7	3.075	4.7	3.475	13.4	4.625	2.925	4.175	2.95	4.86667	3.6	Not measured because of the poor preservation
